# Supplementary material for: Isolation and Characterization of Lactobacillus brevis Phages
Source: MDPI journal article supplement (doi:10.3390/v11050393), 2019-04-26
Supplement: s1 [file s1]

A.

### UCCLBBS124

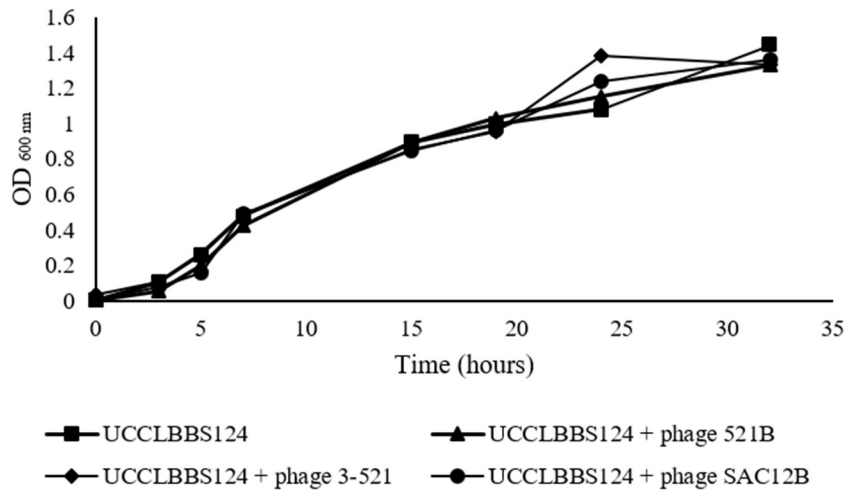

B.

### UCCLB521

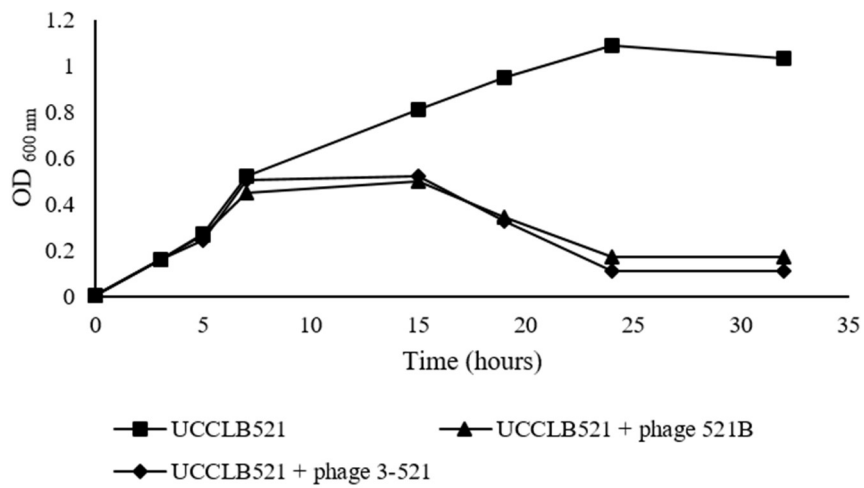

C.

### SA-C12

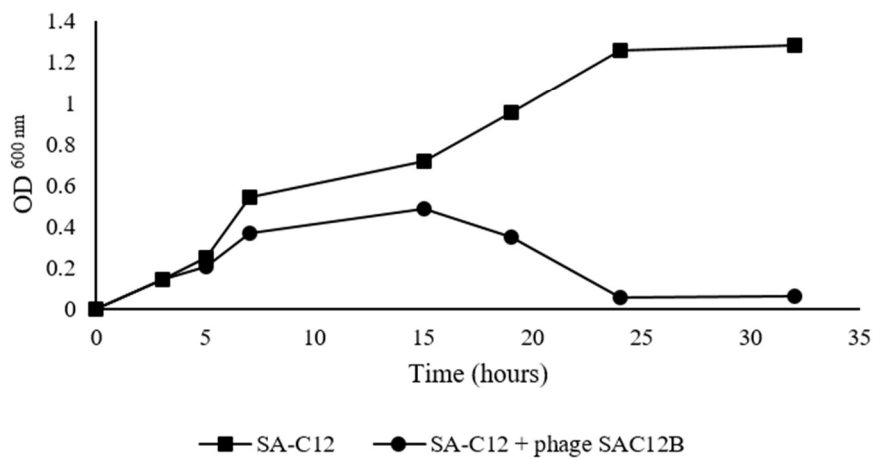

Figure S1: Growth of **(A)** *Lb. brevis* beer-spoiling strain UCCLBBS124, **(B)** *Lb. brevis* strain UCCLB521 and **(C)** *Lb. brevis* strain SA-C12 when challenged with lytic phages (MOI = 1 when the culture reached an OD<sub>600nm</sub> of 0.2). A culture of the bacterial strain where no phage was added was used as a control.
